# Supplementary material
Source: Royal Society of Chemistry journal article supplement (doi:10.1039/d6nr00706f)
Supplement: d6nr00706f1.pdf [file d6nr00706f1.pdf]

# Supplementary material

**Defect-Assisted Vertical Proton Channels in Highly Oriented Bismuth**

**Strontium Tantalum Oxide Nanosheet Laminar Films**

Xiang Sun, Mohammad Atiqur Rahman, Satsuki Tomatsu, Yuichi Sakuda, Kazuto

Hatakeyama, and Shintaro Ida\*

Institute of Industrial Nanomaterials (IINa), Kumamoto University, Kumamoto 860-8555,

Japan Email: [ida-s@kumamoto-u.ac.jp](mailto:ida-s@kumamoto-u.ac.jp)

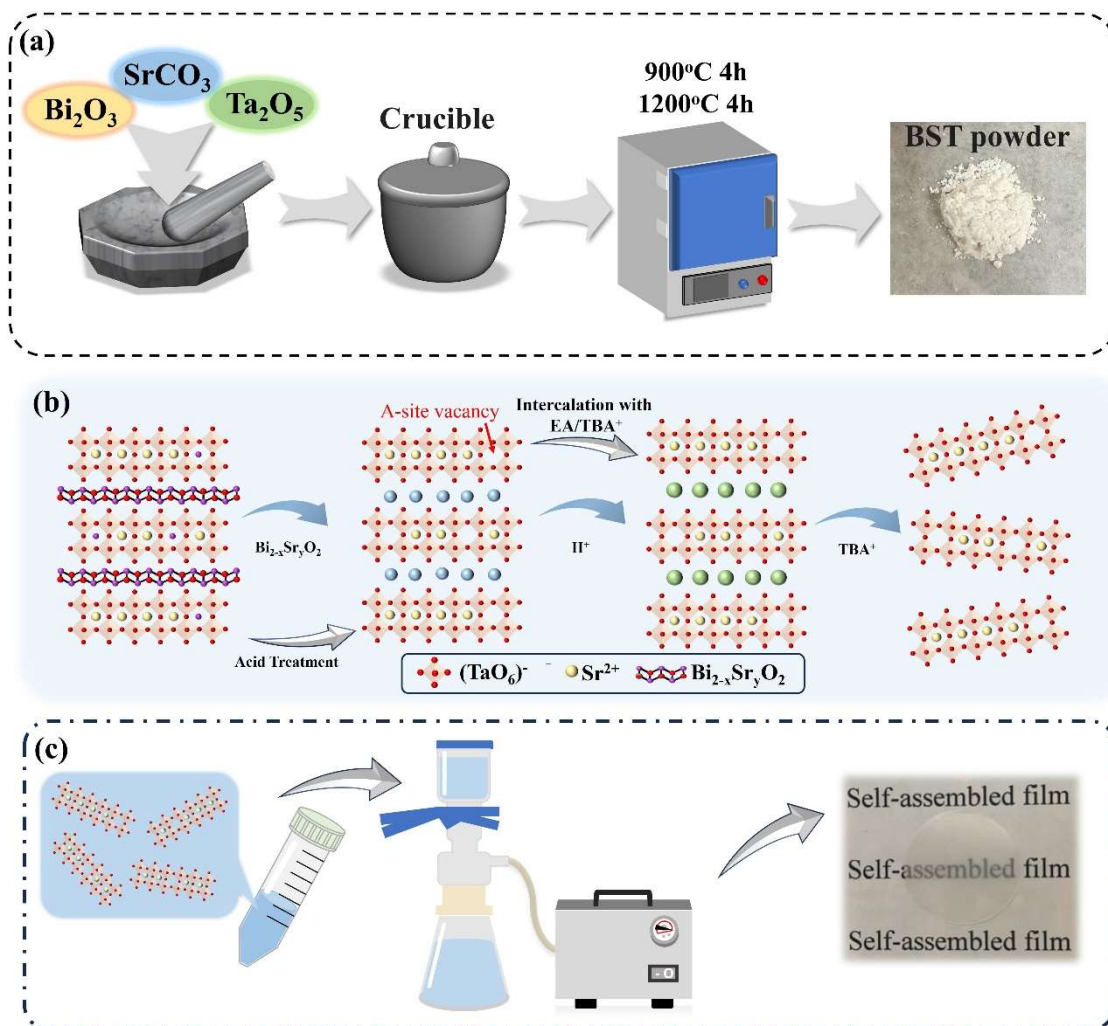

**Figure S1.** (a) Schematic illustration of the preparation of BST powder via solid-state method. (b) Schematic illustration of the acid-treatment induced A-site vacancy and subsequent EA/TBA<sup>+</sup> intercalation process. (c) Schematic illustration of the vacuum-assisted process.

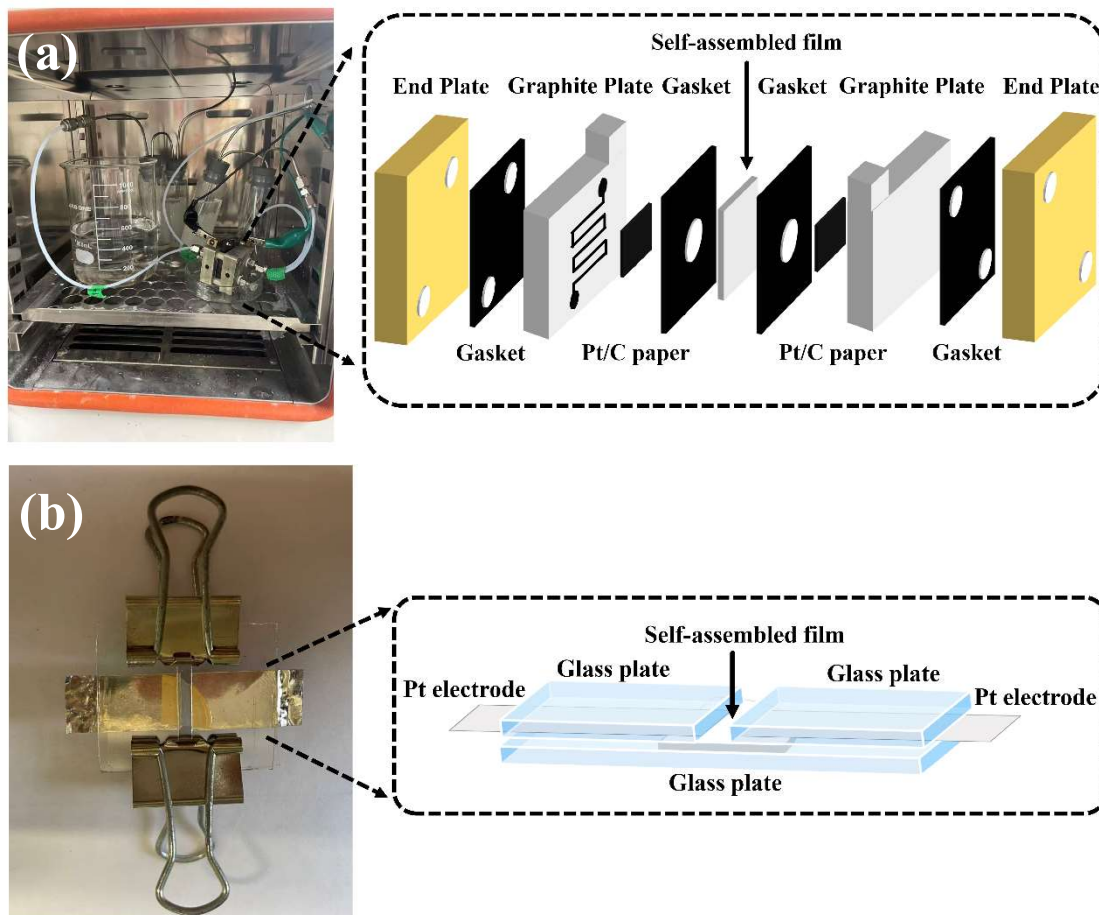

**Figure S2.** Photographs and schematic illustrations of proton conduction test setup. (a) out-of-plane direction, (b) In-plane direction.

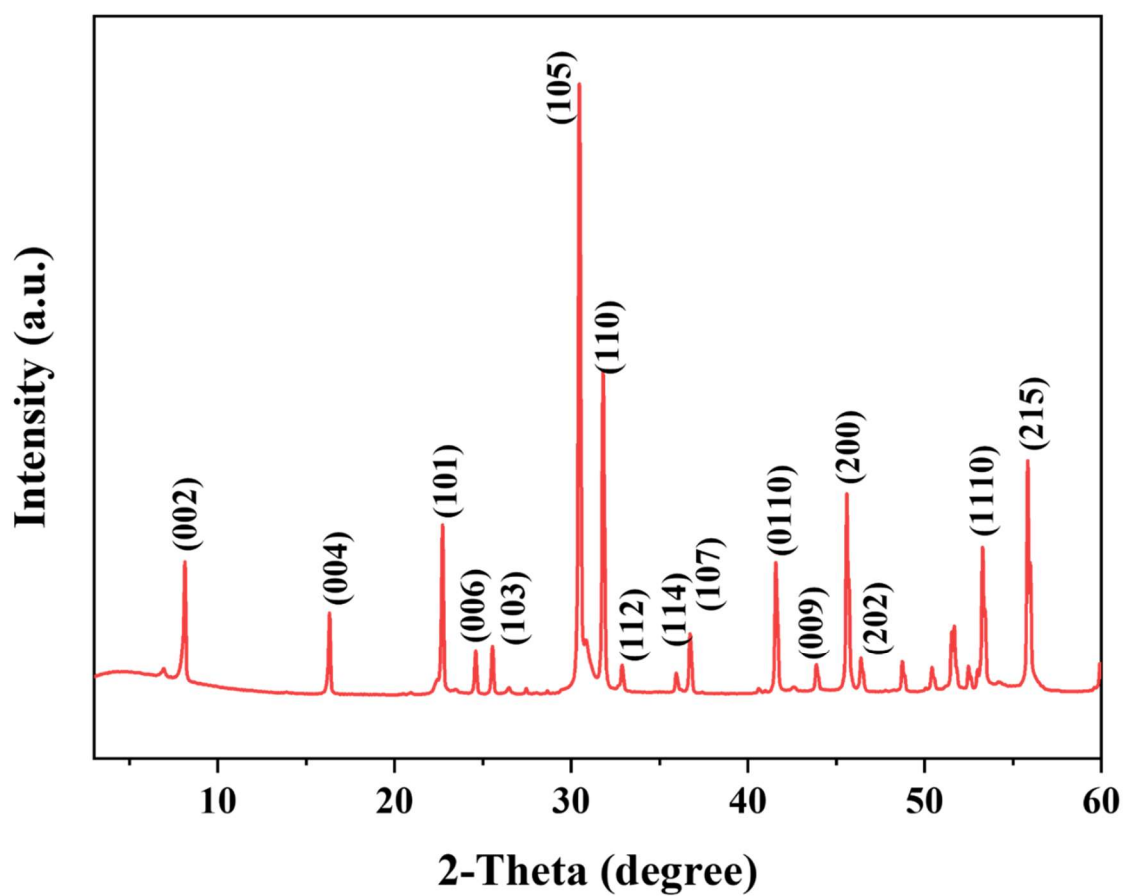

Figure S3. XRD images of original  $K_2SrTa_2O_7$ .

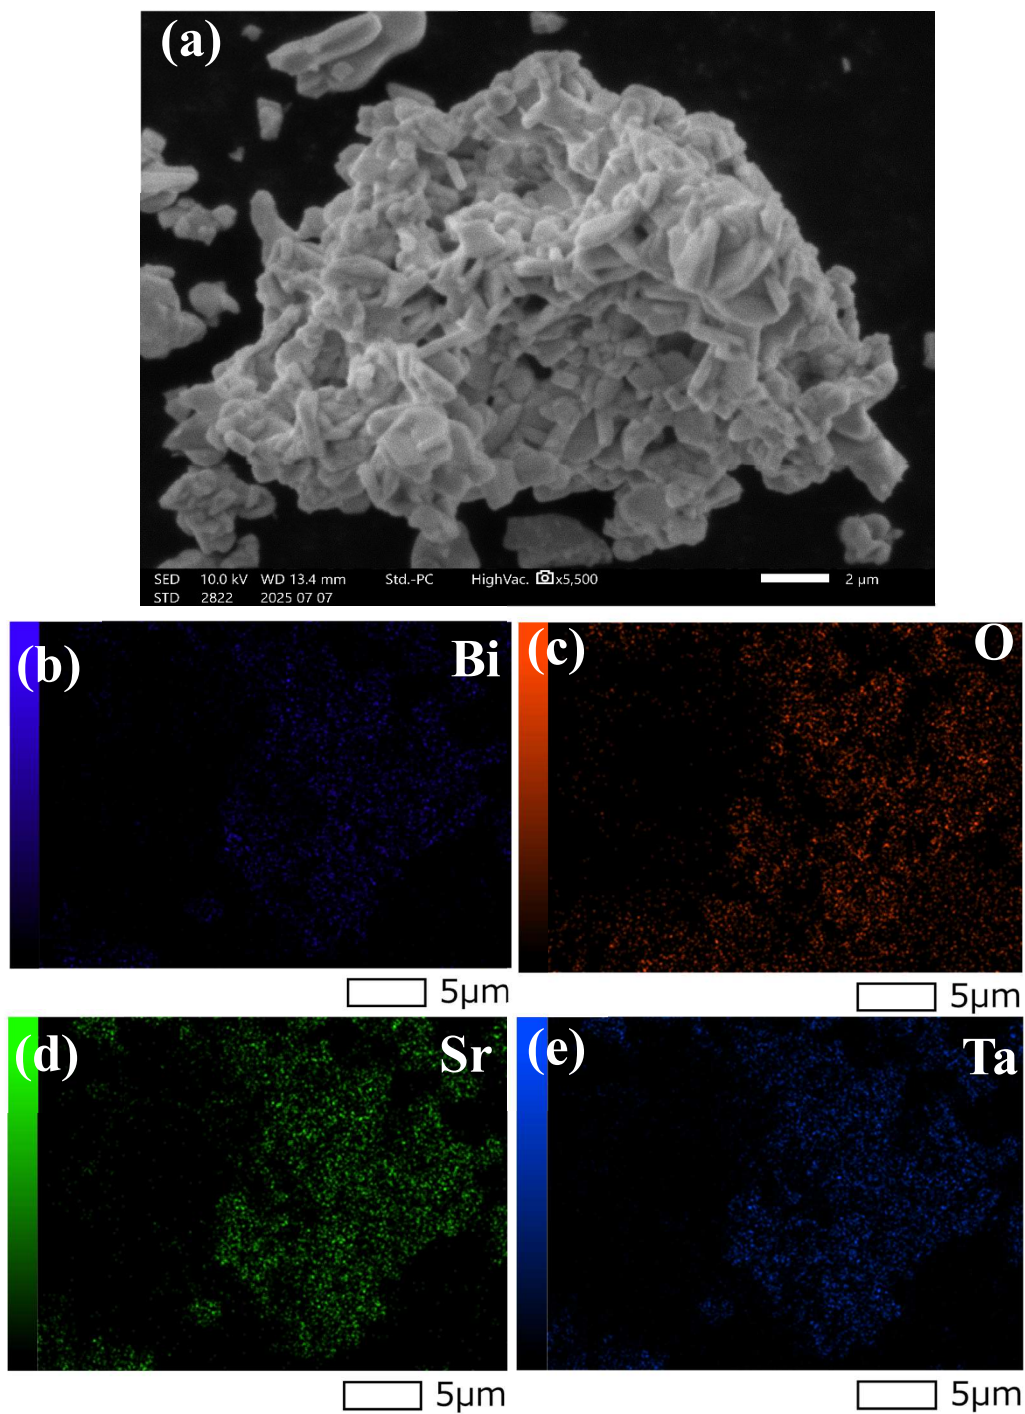

**Figure S4.** EDS elemental mapping of the original  $\text{Bi}_2\text{SrTa}_2\text{O}_7$  (a) SEM image, (b)–(e) the corresponding elemental mapping of Bi, O, Sr and Ta, respectively.

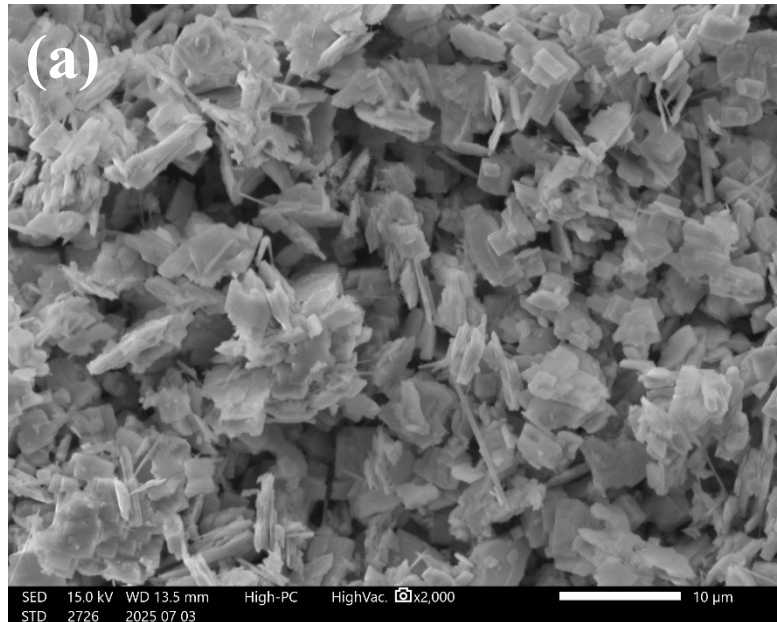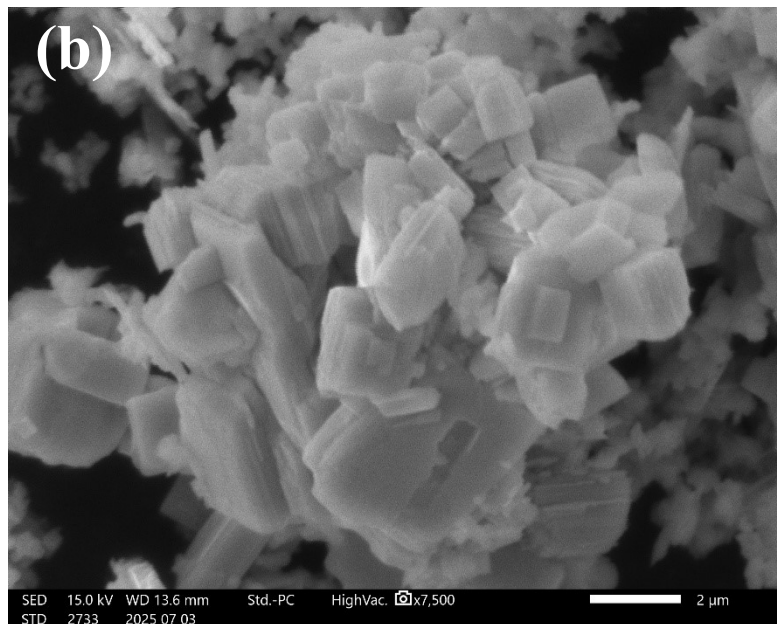

**Figure S5.** SEM images of original  $\text{K}_2\text{SrTa}_2\text{O}_7$  (a) low magnification and (b) high magnification.

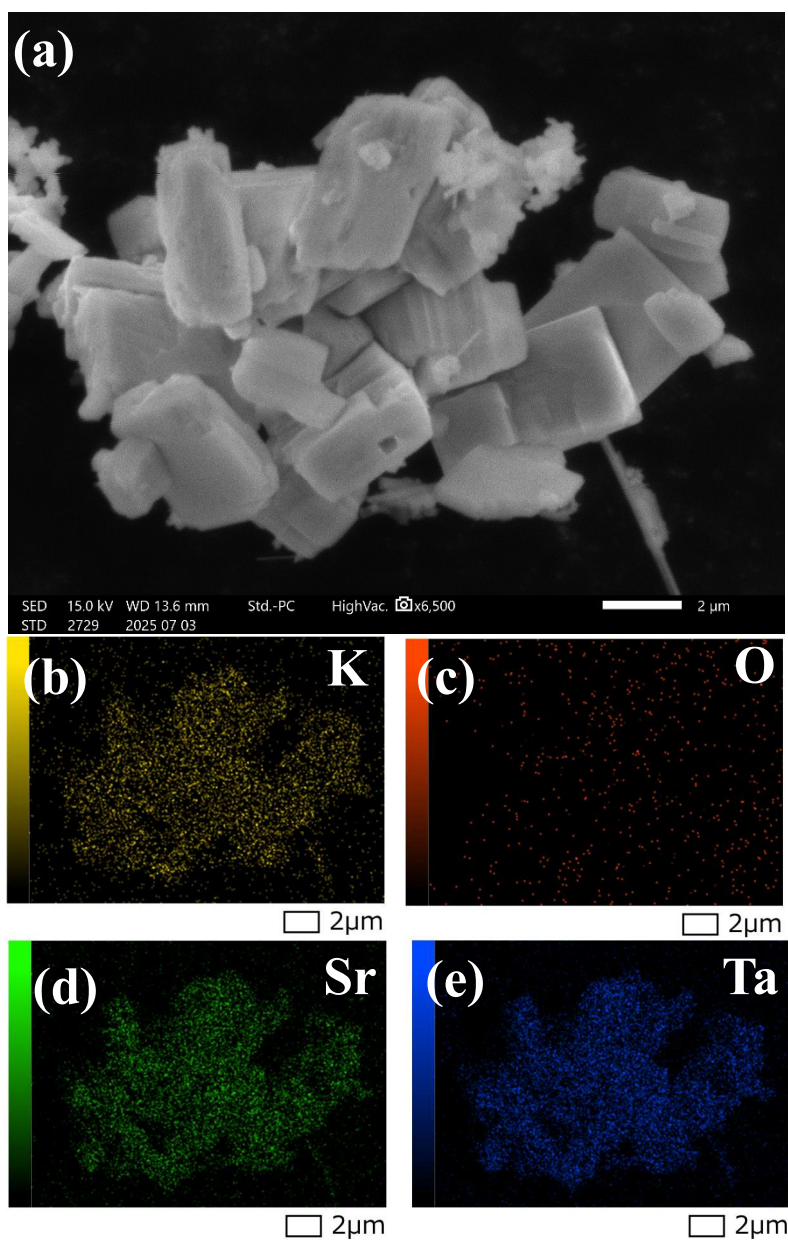

**Figure S6.** EDS elemental mapping of the original  $\text{K}_2\text{SrTa}_2\text{O}_7$  (a) SEM image, (b)–(e) the corresponding elemental mapping of K, O, Sr and Ta, respectively.

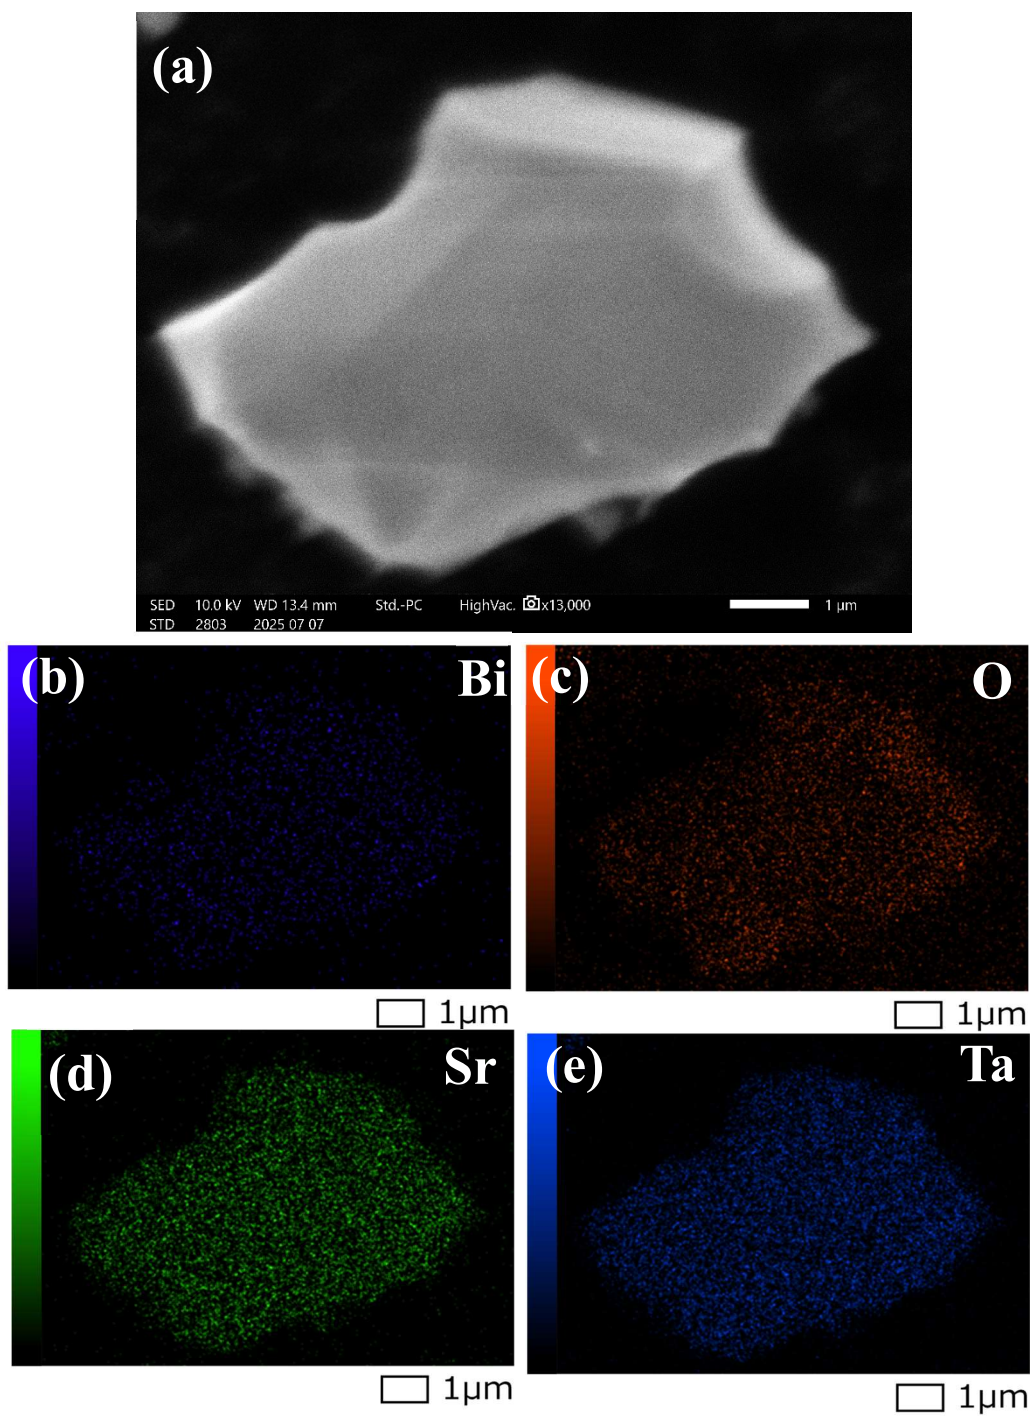

**Figure S7.** EDS elemental mapping of the H-BST (a) SEM image, (b)–(e) the corresponding elemental mapping of Bi, O, Sr and Ta, respectively.

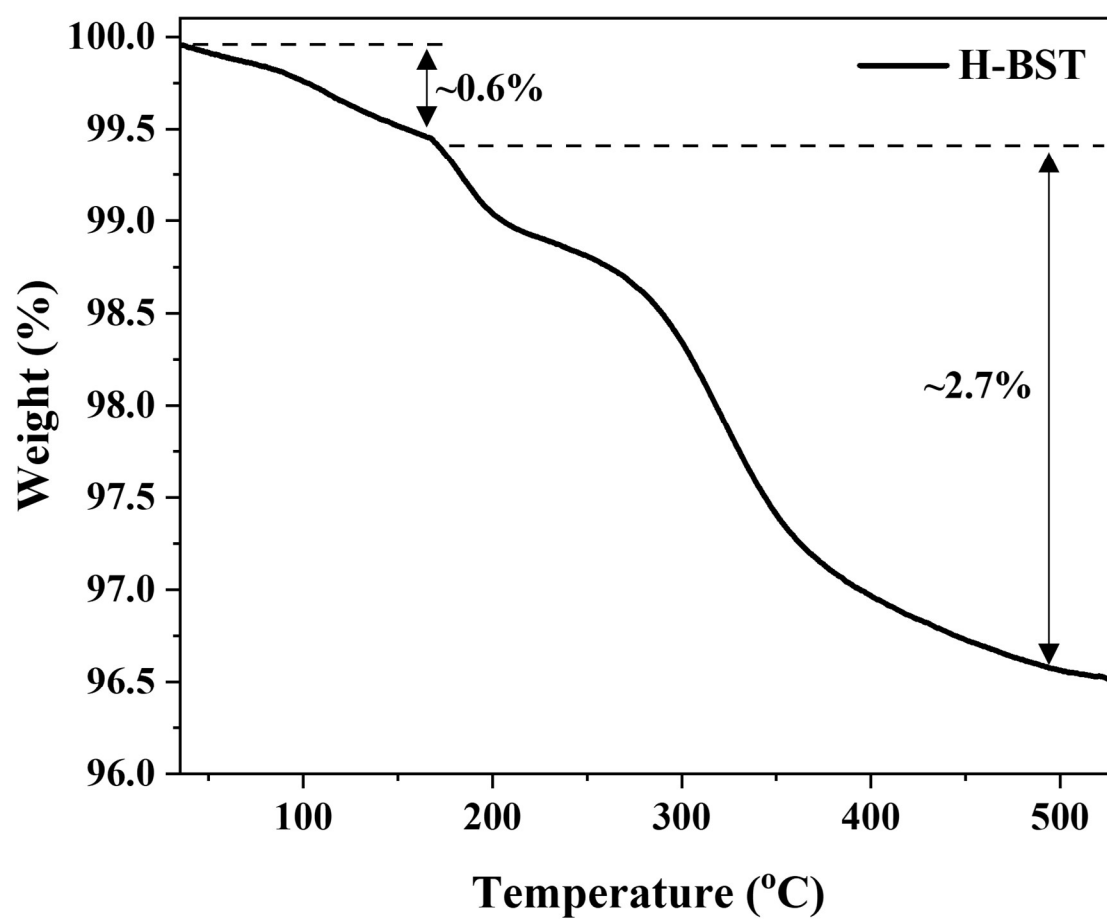

Figure S8. TGA curve of H-BST heated air atmosphere.

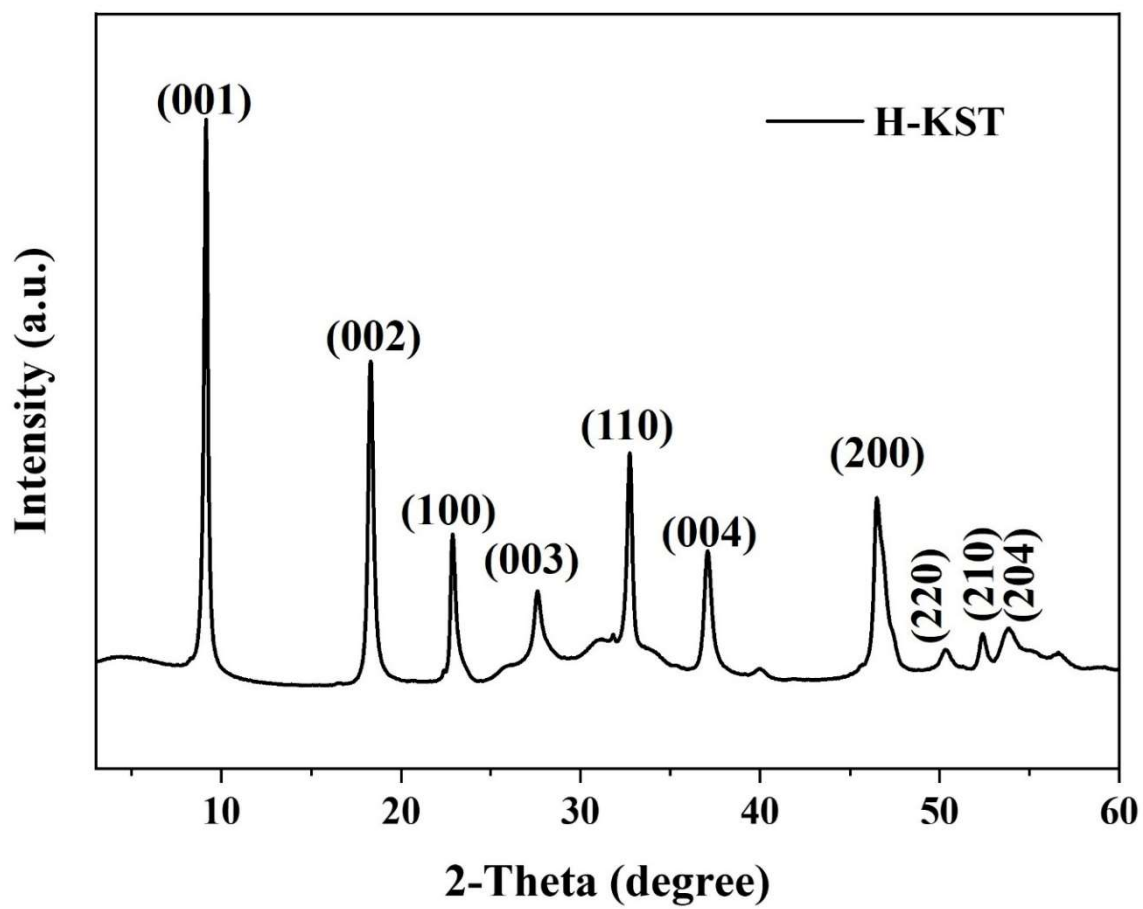

Figure S9. XRD images of H-KST.

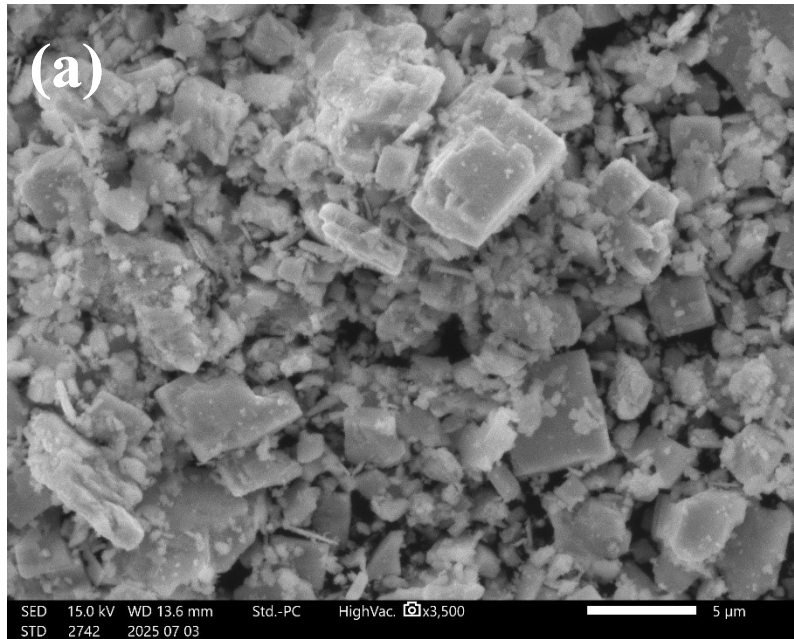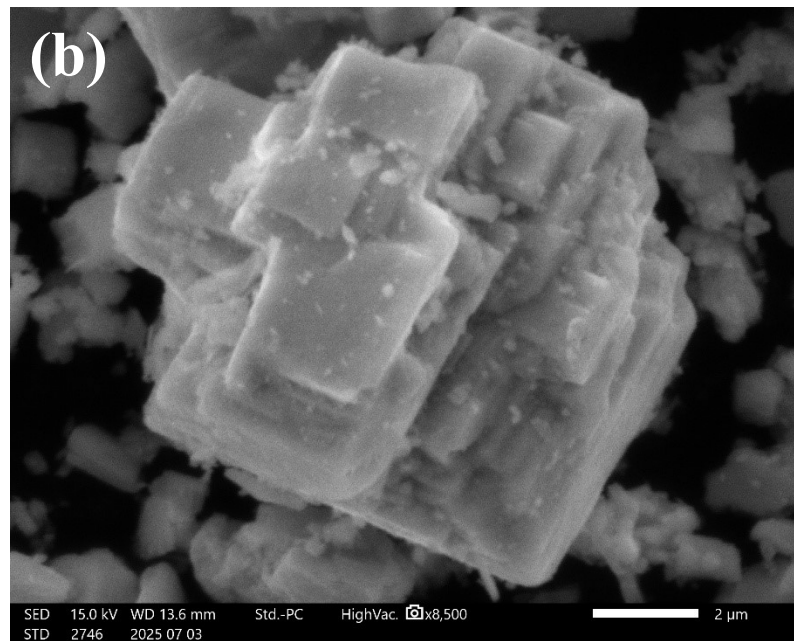

**Figure S10.** SEM images of H-KST (a) low magnification and (b) high magnification.

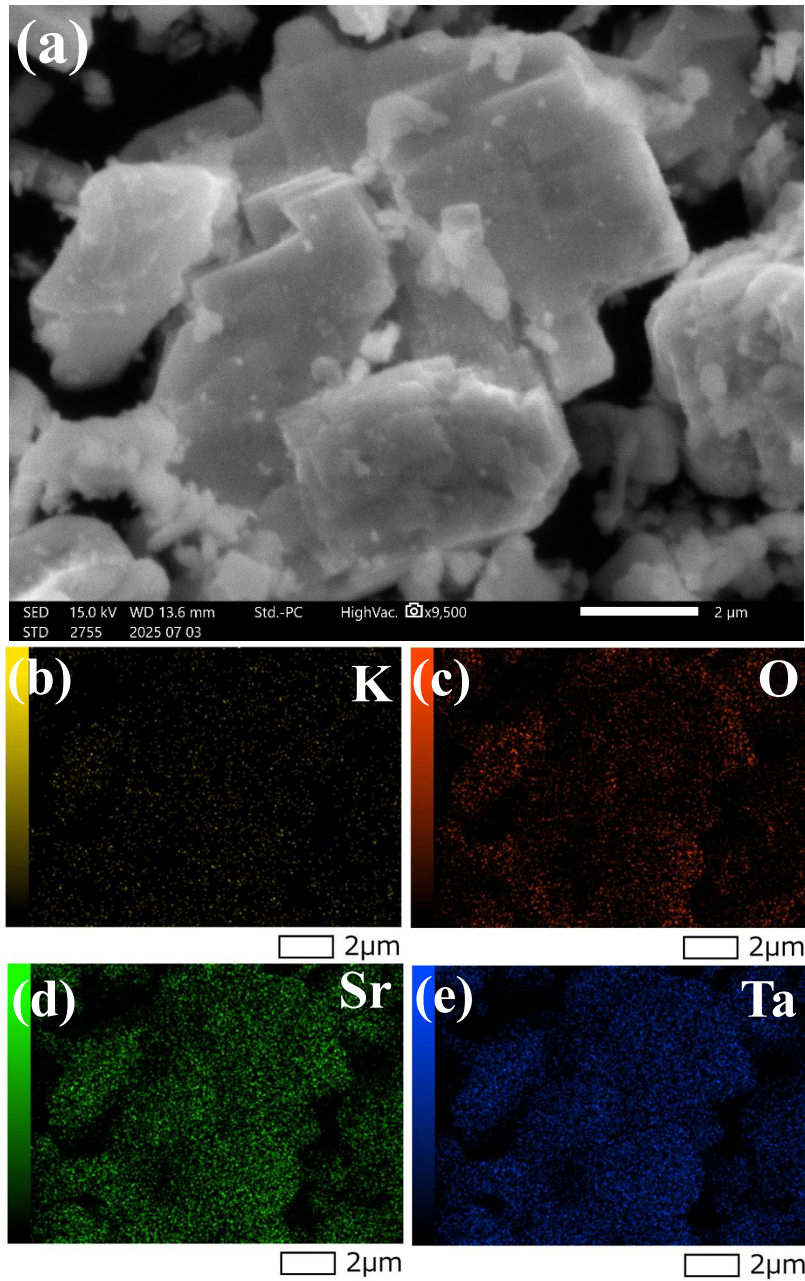

**Figure S11.** EDS elemental mapping of the H-KST (a) SEM image, (b)–(e) the corresponding elemental mapping of K, O, Sr and Ta, respectively.

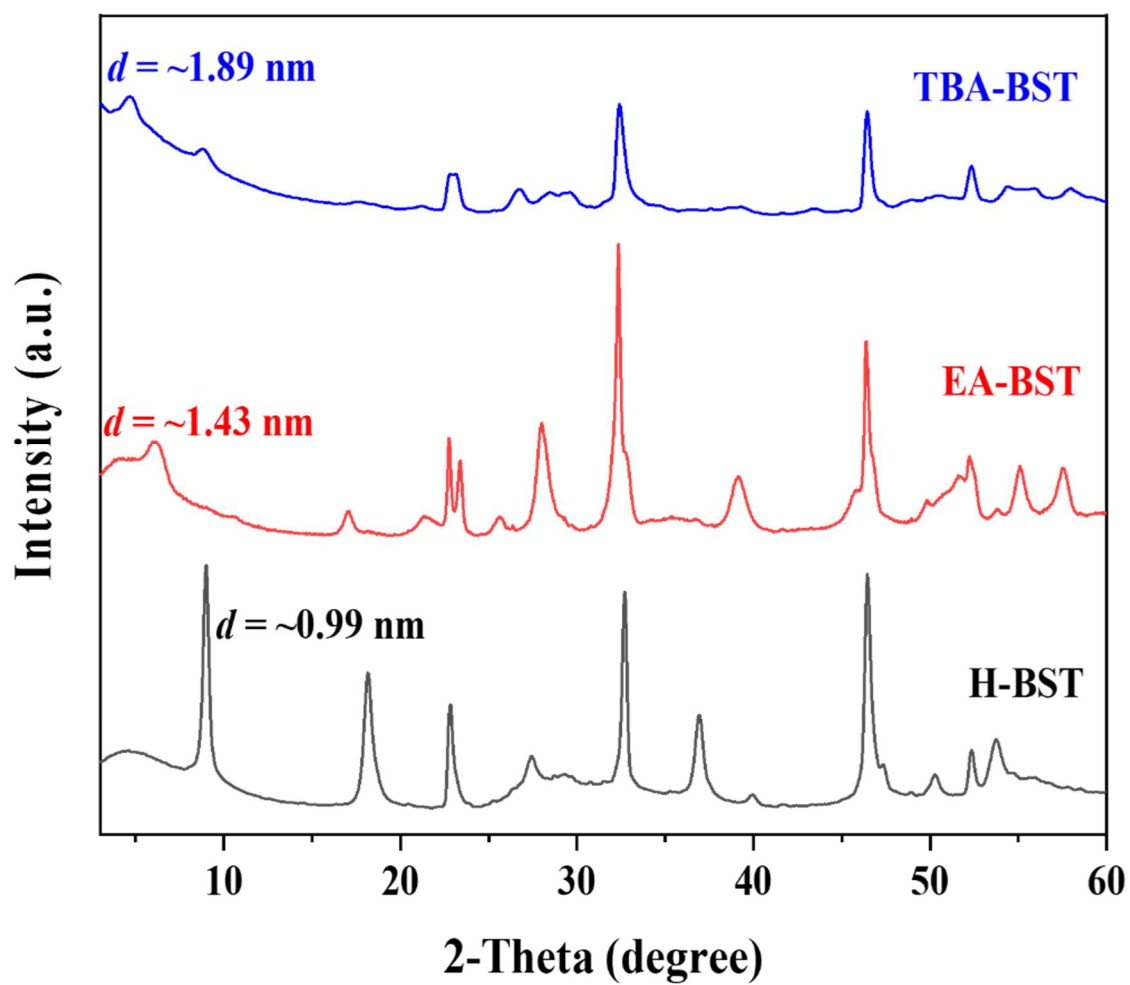

**Figure S12.** Summary of XRD patterns of H-BST (black line), EA-BST (red line) and TBA-BST (blue line).

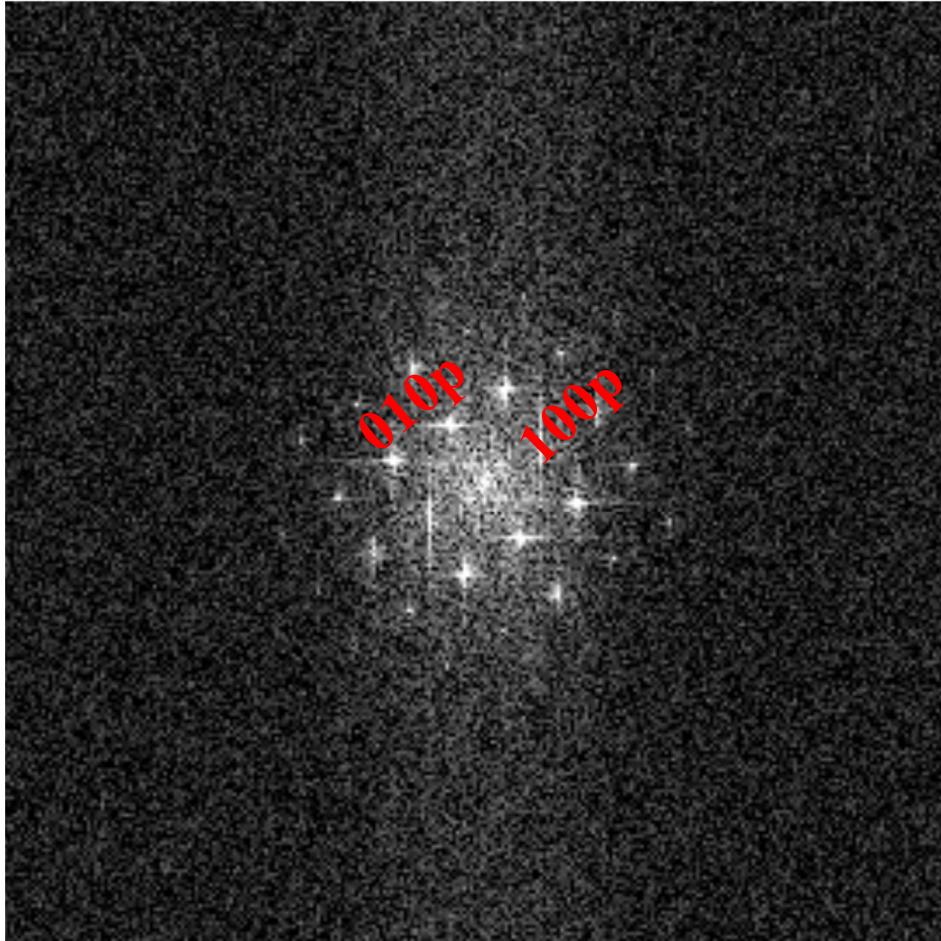

**Figure S13.** Corresponding FFT pattern of the  $[\text{Sr}_{0.70}\text{Bi}_{0.21}\square_{0.10}\text{Ta}_2\text{O}_7]^{2-}$  nanosheet.

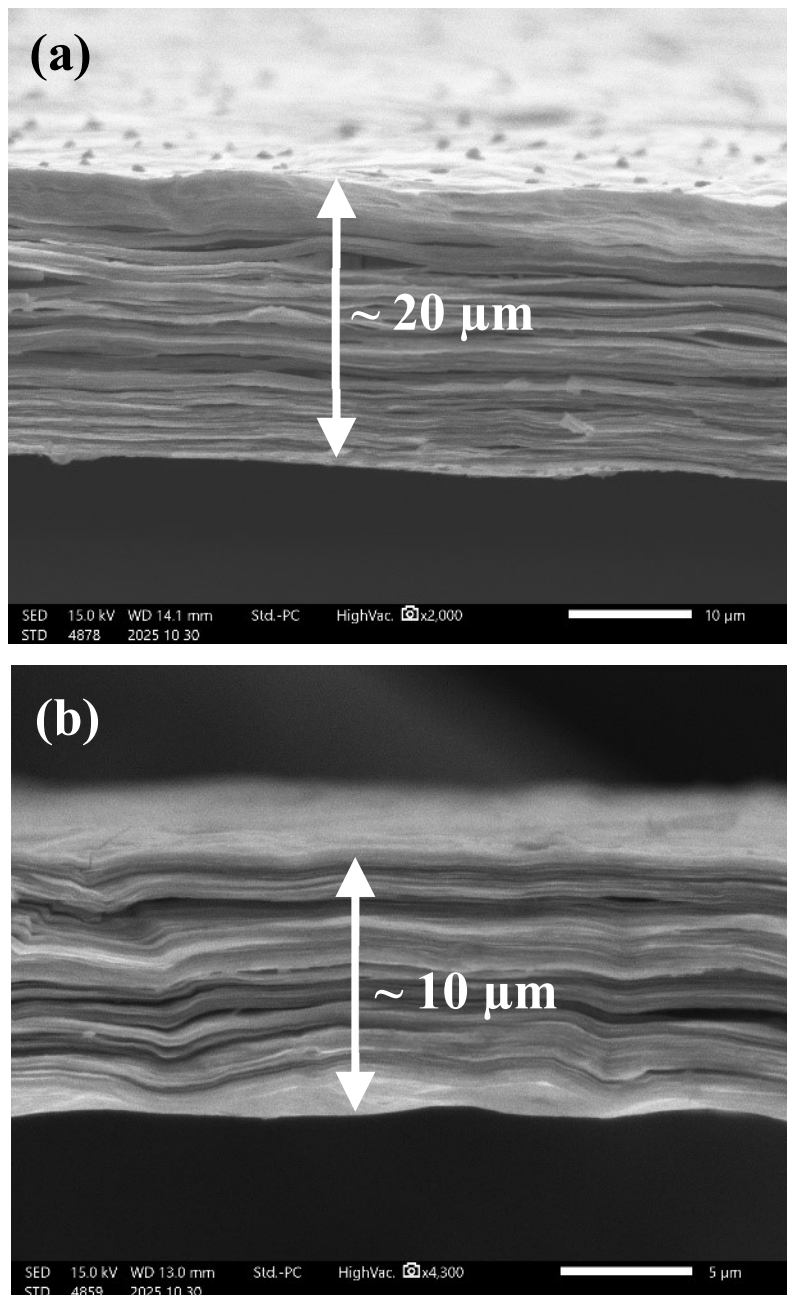

**Figure S14.** Cross-sectional SEM image of the  $[\text{Sr}_{0.70}\text{Bi}_{0.21}\square_{0.10}\text{Ta}_2\text{O}_7]^{2-}$  self-assembled membrane with different thickness, (a)  $\sim 20\ \mu\text{m}$  and (b)  $\sim 10\ \mu\text{m}$ .

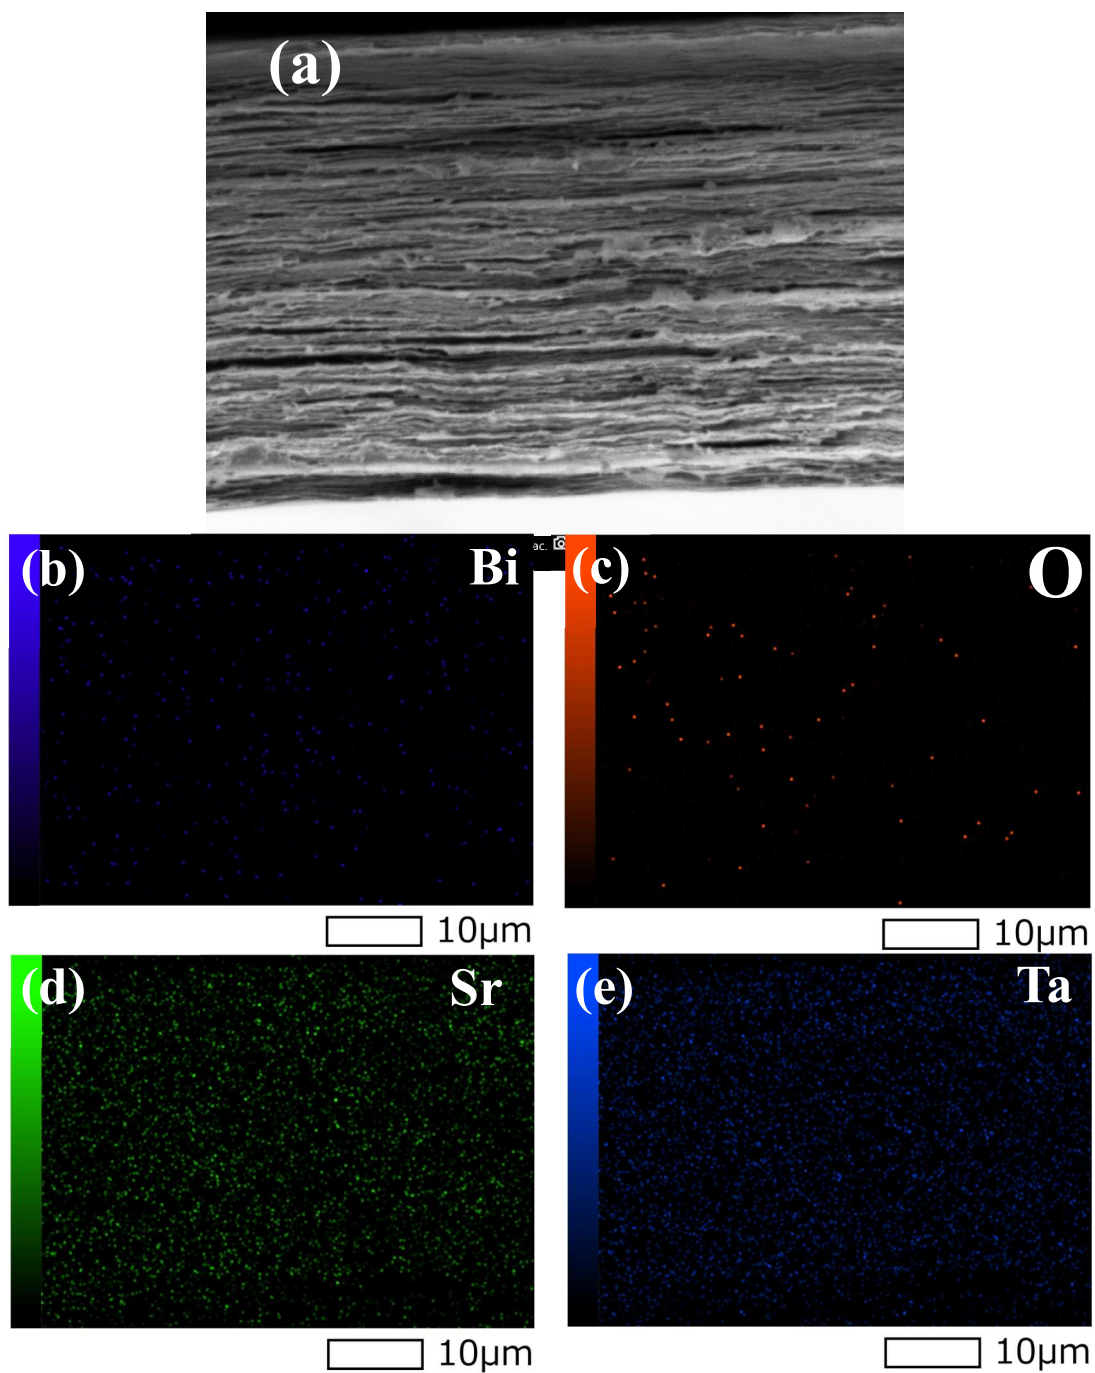

**Figure S15.** EDS elemental mapping of the  $[\text{Sr}_{0.70}\text{Bi}_{0.21}\square_{0.10}\text{Ta}_2\text{O}_7]^{2-}$  self-assembled membrane (a) SEM image, (b)–(e) the corresponding elemental mapping of Bi, O, Sr and Ta, respectively.

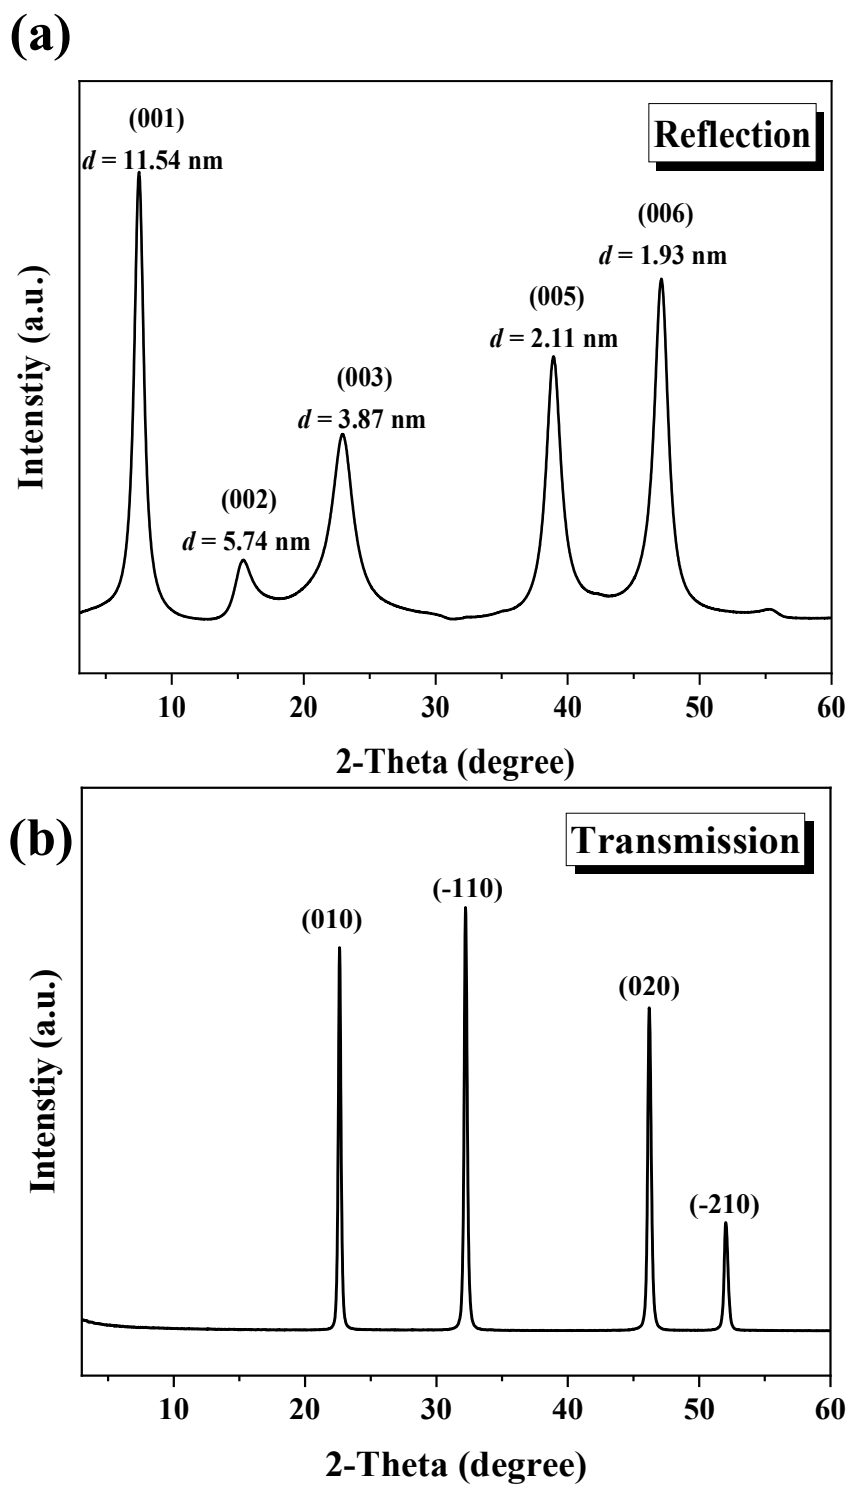

**Figure S16.** (a) Reflection and (b) transmission XRD images of  $[\text{SrTa}_2\text{O}_7]^{2-}$  self-assembled membrane.

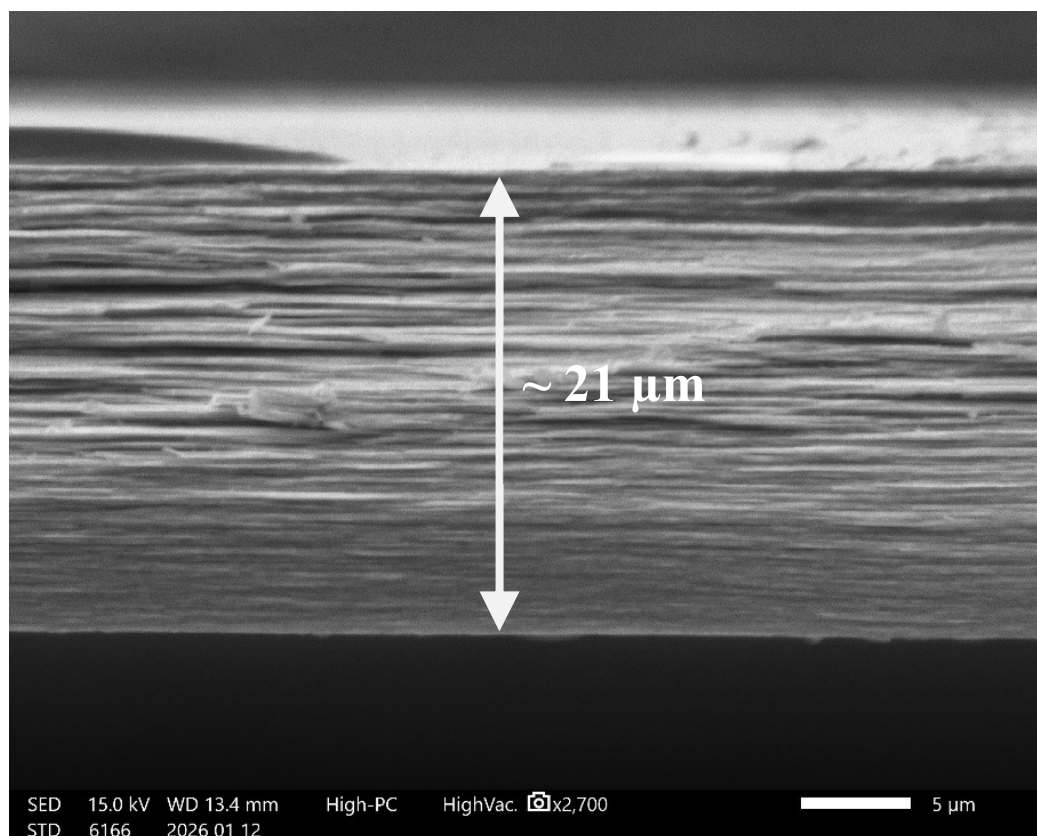

**Figure S17.** Cross-sectional SEM image of  $[\text{SrTa}_2\text{O}_7]^{2-}$  self-assembled membrane.

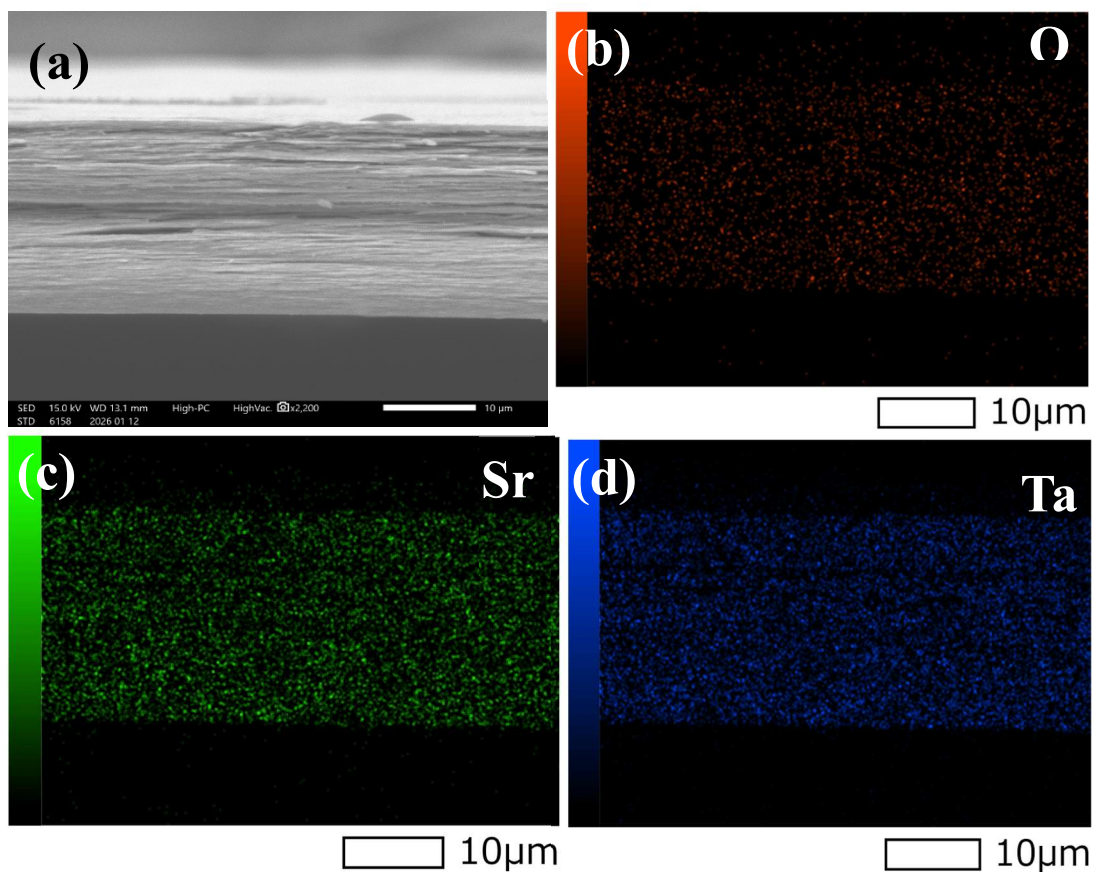

**Figure S18.** EDS elemental mapping of the  $[\text{SrTa}_2\text{O}_7]^{2-}$  self-assembled membrane: (a) SEM image, (b)–(d) the corresponding elemental mapping of O, Sr and Ta, respectively.

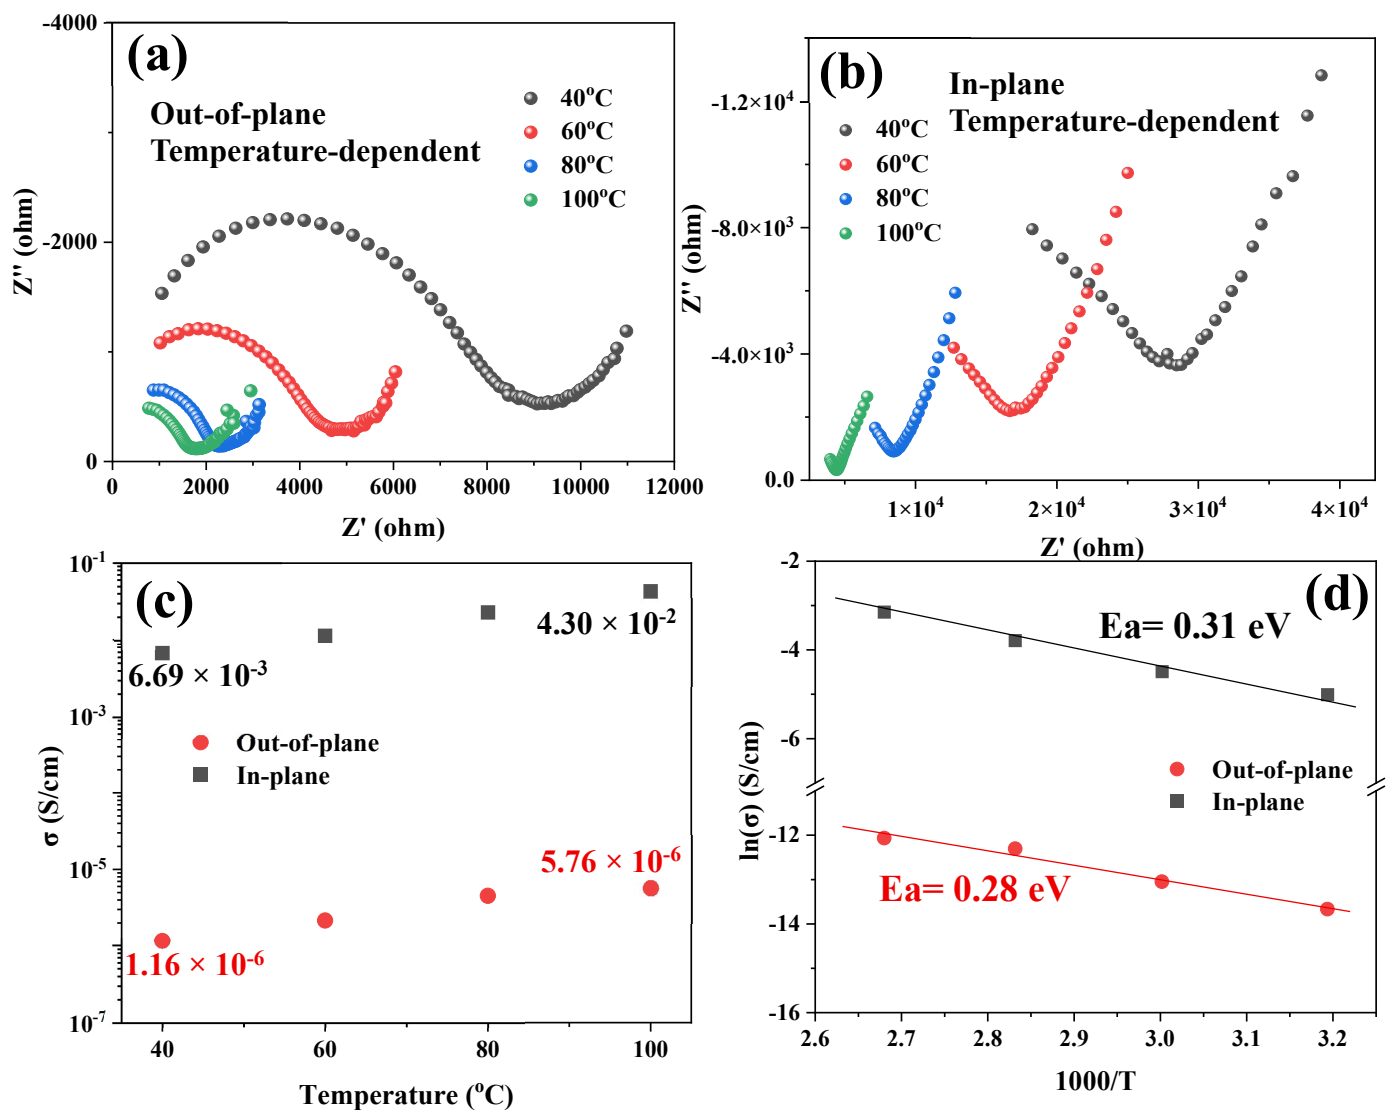

**Figure S19.** Temperature-dependent proton conducting property of  $[\text{SrTa}_2\text{O}_7]^{2-}$  self-assembled membranes at 100% RH. (a) Nyquist plot of out-of-plane direction at 40, 60, 80 100 °C. (b) Nyquist plot of in-plane direction at 40, 60, 80 100 °C. (c) Comparison of proton conductivity ( $\sigma$ ) in the out-of-plane and in-plane directions. (d) Arrhenius plot of proton conductivity of  $\text{SrTa}_2\text{O}_7$  self-assembled membranes in the out-of-plane and in-plane directions.
